# Supplementary material for: Synovial Macrophages Expression of OX40L Is Required for Follicular Helper T Cells Differentiation in the Joint Microenvironment
Source: MDPI journal article supplement (doi:10.3390/cells11203326), 2022-10-21
Supplement: s1 [file s1]

## Supplementary table

**Table S1. Clinical information of the participants (mean  $\pm$  SD).**

| Participants, n=35           | Osteoarthritis=19 | Rheumatoid arthritis=16 | p value |
|------------------------------|-------------------|-------------------------|---------|
| Age (yeas)                   | 54.16 $\pm$ 6.212 | 53.13 $\pm$ 7.051       | 0.648   |
| Weight (kg)                  | 62.58 $\pm$ 6.203 | 65.06 $\pm$ 5.859       | 0.235   |
| BMI (kg/m <sup>2</sup> )     | 24.68 $\pm$ 0.938 | 24.34 $\pm$ 0.726       | 0.244   |
| Smoking status<br>(Yes/No)   | 1/18              | 1/15                    | 0.815   |
| Drinking status<br>(Yes/No)  | 2/17              | 2/14                    | 0.721   |
| Diabetes type II<br>(Yes/No) | 4/15              | 3/13                    | 0.976   |
| Hypertension<br>(Yes/No)     | 3/16              | 4/12                    | 0.755   |
| Number of<br>medications     | 1 $\pm$ 0.21      | 0.95 $\pm$ 0.19         | 0.659   |
| Sex (Male/Female)            | 11/8              | 3/13                    | /       |
| Disease duration<br>(month)  | 13                | 18                      | /       |
| DAS28 scores                 | /                 | 4.5 $\pm$ 0.3           | /       |

## Supplementary figures and legends

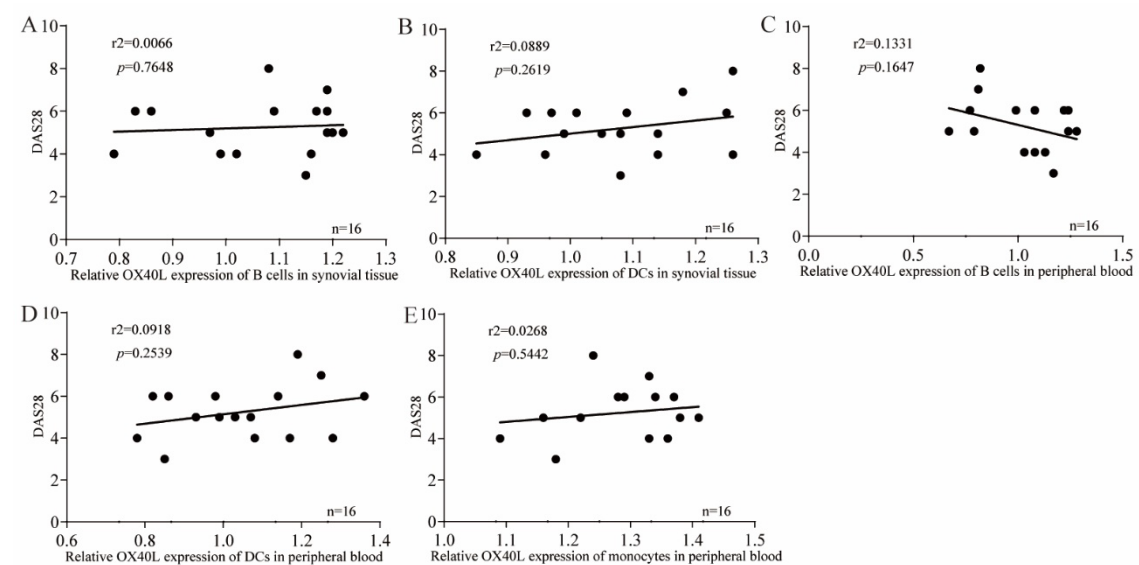

**Figure S1. Correlation analysis between B cells or dendritic cells and DAS28. (A)**

Correlation analysis of OX40L level of CD19<sup>+</sup> B cells in the synovial tissues with DAS28 in RA patients. (B) Correlation analysis of OX40L level of CD11b<sup>+</sup>CD11c<sup>+</sup> DCs in the synovial tissues with DAS28 in RA patients. (C) Correlation analysis of OX40L level of CD19<sup>+</sup> B cells in the peripheral blood with DAS28 in RA patients. (D) Correlation analysis of OX40L level of CD11c<sup>+</sup> DCs in the peripheral blood with DAS28 in RA patients. (E) Correlation analysis of OX40L level of CD14<sup>+</sup> monocytes in the peripheral blood with DAS28 in RA patients.  $P < 0.05$  represents that the vertical coordinate is correlated with the horizontal coordinate, otherwise there is no correlation (Linear regression was used).

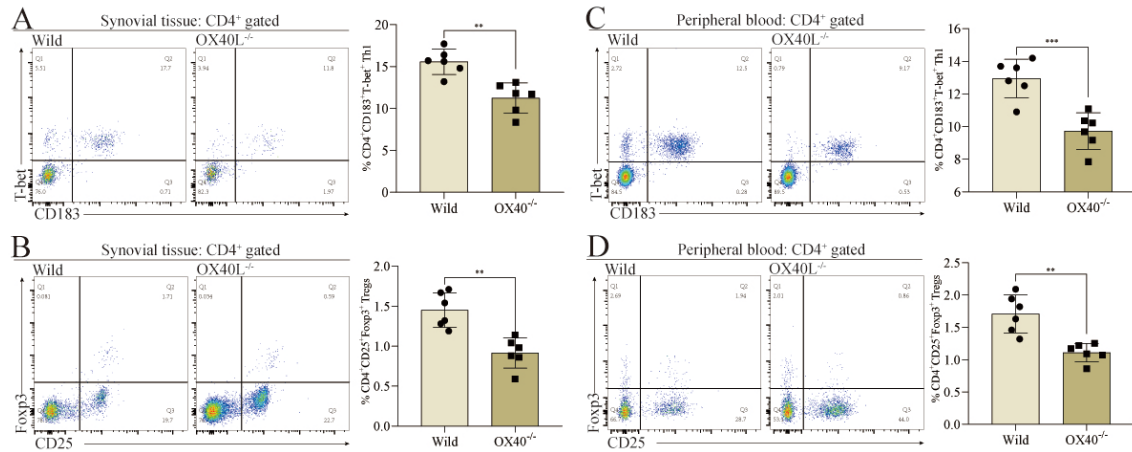

**Figure S2. The proportion of Th1 or Tregs in CD4<sup>+</sup> T cells.** (A) The proportion of CD183<sup>+</sup>T-bet<sup>+</sup> Th1 in CD4<sup>+</sup> T cells in the synovial tissues of wild and OX40L<sup>-/-</sup> mice. (B) The proportion of CD25<sup>+</sup>Foxp3<sup>+</sup> Tregs in CD4<sup>+</sup> T cells in the synovial tissues of wild and OX40L<sup>-/-</sup> mice. (C) The proportion of CD183<sup>+</sup>T-bet<sup>+</sup> Th1 in CD4<sup>+</sup> T cells in the peripheral blood of wild and OX40L<sup>-/-</sup> mice. (D) The proportion of CD25<sup>+</sup>Foxp3<sup>+</sup> Tregs in CD4<sup>+</sup> T cells in the peripheral blood of wild and OX40L<sup>-/-</sup> mice. \*\*  $P < 0.01$  and \*\*\*  $P < 0.001$  represent a significant difference between wild group and OX40L<sup>-/-</sup> group. Data represent mean  $\pm$  SD (unpaired t test was used).

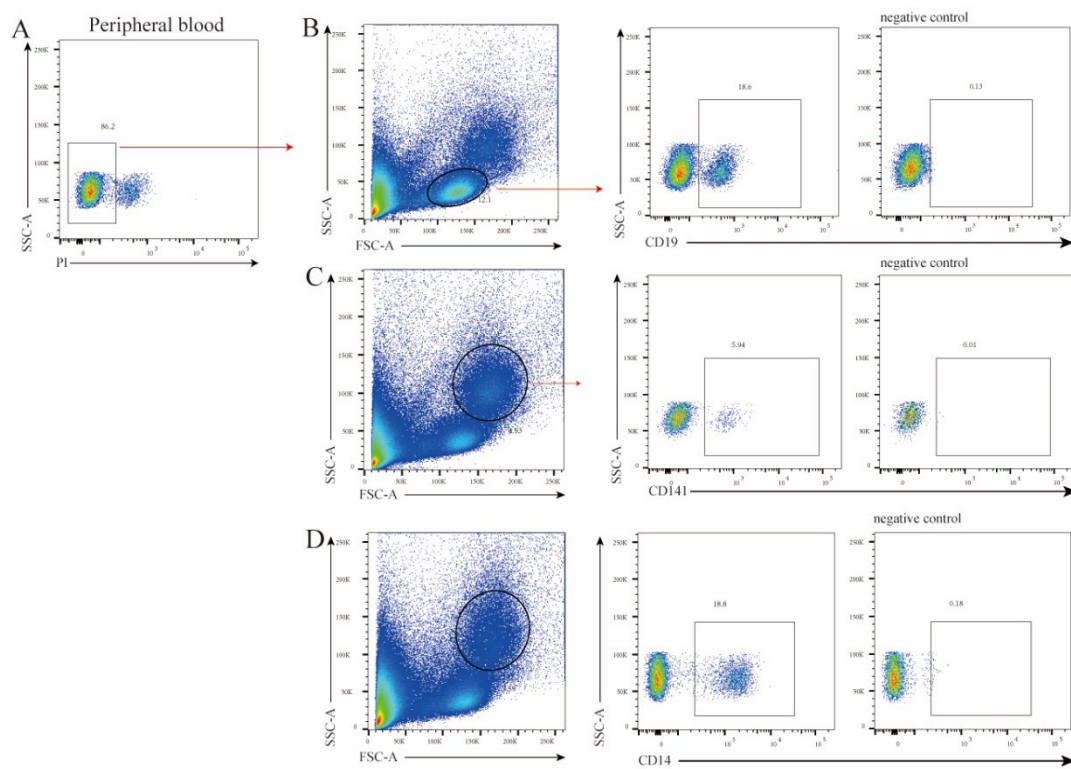

**Figure S3. The gating strategy and negative control for sorting peripheral blood CD19<sup>+</sup>, CD141<sup>+</sup>, or CD14<sup>+</sup> cells. (A) The live/dead cell staining for peripheral blood single cell. (B) Gating strategy and negative control for sorting CD19<sup>+</sup> cells in peripheral blood. (C) Gating strategy and negative control for sorting CD141<sup>+</sup> cells in peripheral blood. (D) Gating strategy and negative control for sorting CD14<sup>+</sup> cells in peripheral blood.**

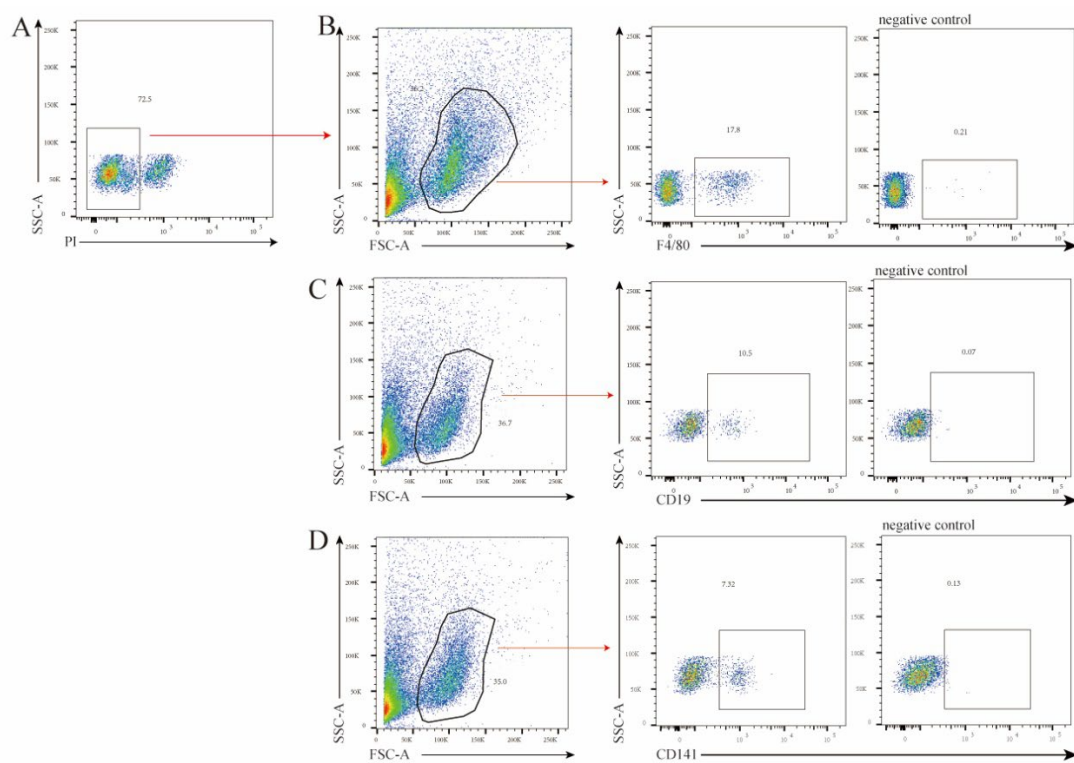

**Figure S4. The gating strategy and negative control for sorting synovial tissue CD19<sup>+</sup>, CD141<sup>+</sup>, or F4/80<sup>+</sup> cells.** (A) The live/dead cell staining for synovial tissue single cell. (B) Gating strategy and negative control for sorting F4/80<sup>+</sup> cells in synovial tissue. (C) Gating strategy and negative control for sorting CD19<sup>+</sup> cells in synovial tissue. (D) Gating strategy and negative control for sorting CD141<sup>+</sup> cells in synovial tissue.
